# Supplementary material for: Pandemic Puppies: Demographic Characteristics, Health and Early Life Experiences of Puppies Acquired during the 2020 Phase of the COVID-19 Pandemic in the UK
Source: MDPI journal article supplement (doi:10.3390/ani12050629), 2022-03-02
Supplement: s1 [file s1]

**Qualitative Coding Framework for assigning the free-text responses to VetCompass™ disorder terms**

The entire data set consisting of 6527 valid responses was assigned to VetCompass™ disorder terms at the same time, i.e., additionally including those puppies purchased between 1 January and 22 March for both years.

In the case of this question (Q46/Q60), where multiple responses were allowed, all relevant comments were assigned to VetCompass™ disorder terms

The following tables give details of the VetCompass™ disorder terms for the question assigned for this publication along with examples of comments.

**Q46/Q60: Soon after you brought your puppy home, did you notice any of the following?**

- Other (please specify) (n=219)

| <b>VetCompass™ Disorder Term</b>                     | <b>Example(s)</b>                                                                                                                 |
|------------------------------------------------------|-----------------------------------------------------------------------------------------------------------------------------------|
| Abdominal disorder                                   | <i>"Swollen tummy"</i>                                                                                                            |
| Anal sac disorder                                    | <i>"Compacted anal glands...", "Anal glands needed expression"</i>                                                                |
| Appetite disorder                                    | <i>"Lack of appetite", "She hardly ate for days..."</i>                                                                           |
| Collapsed                                            | <i>"There was an issue, there was concern that the litter overheated on the way to vets for first vaccination &amp; chipping"</i> |
| Complication associated with clinical care procedure | <i>"This was to do with previous operation..."</i>                                                                                |
| Drug therapy adverse reaction                        | <i>"He was on anti biotic when he came to us but then required more"</i>                                                          |
| Ear (aural) disorder                                 | <i>"Ear infection", "After a week the puppy had a red ear..."</i>                                                                 |
| Enteropathy                                          | <i>"Parvovirus", "Giardia", "Blood in stools", "Being sick..."</i>                                                                |
| Female reproductive abnormality                      | <i>"Vaginal discharge", "Vaginitis"</i>                                                                                           |
| Foreign body                                         | <i>"Foreign body was suspected"</i>                                                                                               |
| Haematopoietic system disorder                       | <i>"Blood from rectum"</i>                                                                                                        |
| Hearing impaired/deafness                            | <i>"The pup is deaf"</i>                                                                                                          |
| Heart (cardiac) disease                              | <i>"A loud heart murmur...", "Heart condition"</i>                                                                                |
| Hernia                                               | <i>"umbilical hernia", "He needed a hernia operation..."</i>                                                                      |
| Lethargy                                             | <i>"Extreme tiredness", "Lack of energy"</i>                                                                                      |
| Lower respiratory tract disorder                     | <i>"...chest...",</i>                                                                                                             |
| Mass/lump/swelling                                   | <i>"...swollen eye..."</i>                                                                                                        |
| Musculoskeletal disorder                             | <i>"Diagnosed with loose hip joint...", "Lameness..."</i>                                                                         |
| Ophthalmological disorder                            | <i>"Conjunctivitis", "Entropion", "Inflamed eyelids"</i>                                                                          |
| Oral cavity (mouth) disorder                         | <i>"Hair lip",</i>                                                                                                                |
| Parasite infestation                                 | <i>"Ear mites", "She had walking dandruff."</i>                                                                                   |
| Polyuria/Polydipsia                                  | <i>"Constant drinking", "Excessive weeing"</i>                                                                                    |
| Skin (cutaneous) disorder                            | <i>"Itchy", "Dandruff", "Flaky skin", "...foliculitus..."</i>                                                                     |
| Tail disorder                                        | <i>"... kinked tail"</i>                                                                                                          |
| Thin/underweight                                     | <i>"Underweight", "Was quite thin"</i>                                                                                            |
| Traumatic injury                                     | <i>"Broken tail", "...he had a broken leg..."</i>                                                                                 |
| Undesirable behaviour disorder                       | <i>"...we believe this is anxiety related", "...anxiety of being left alone for short periods."</i>                               |
| Upper respiratory tract disorder                     | <i>"...coughing"</i>                                                                                                              |
| Urinary system disorder                              | <i>"Frequent urine infections", "Urinary track infection"</i>                                                                     |
| Vascular disorder                                    | <i>"...abherrent left subclavian aortic arch"</i>                                                                                 |
