# Supplementary material for: Pandemic Puppies: Demographic Characteristics, Health and Early Life Experiences of Puppies Acquired during the 2020 Phase of the COVID-19 Pandemic in the UK
Source: Animals (Basel). 2022 Mar 2;12(5):629. doi: 10.3390/ani12050629 (PMC8909199; doi:10.3390/ani12050629)
Supplement: Supplementary file 1 [file animals-12-00629-s001.zip]

Archive with 4 entries (3 files):
- animals-1606453-supplementary/
- animals-1606453-supplementary/Brand et al File S1 Questionnaire.pdf
- animals-1606453-supplementary/Brand et al File S2 File Qualitative Coding Framework ¿C Puppy Classes.pdf
- animals-1606453-supplementary/Brand et al File S3 File Coding Framework VetCompassTM Disorder terms.pdf
